# Supplementary material for: Using Expression Profiles of Caenorhabditis elegans Neurons To Identify Genes That Mediate Synaptic Connectivity
Source: PLoS Comput Biol. 2008 Jul 11;4(7):e1000120. doi: 10.1371/journal.pcbi.1000120 (PMC2517614; doi:10.1371/journal.pcbi.1000120)
Supplement: Protocol S1 — Pseudocode for Boosting Tree-CPD Using AdaBoost. (0.07 MB DOC) [file pcbi.1000120.s003.doc]

**Protocol S1. Pseudo-code for boosting tree-CPD using AdaBoost**

Given: a set *I* of *m* data instances, where each data instance is composed of a pre-synaptic neuron , a post-synaptic neuron , a weight , and a flag that is equal to 1 if there exists a chemical synapse in this direction or -1 otherwise.

set D1(i) =

For *n* = 1,….,*N*:

- Learn a tree-CPD for distribution *Dn* using the Bayesian score and a two phase construction heuristic:
- The learned tree-CPD is the weak hypothesis with error:
- Choose
- Update

where *Zn* is a normalization factor (chosen so that *Dn+1* will be a distribution).

- Output the final hypothesis:
