# Supplementary material for: Using Expression Profiles of Caenorhabditis elegans Neurons To Identify Genes That Mediate Synaptic Connectivity
Source: PLoS Comput Biol. 2008 Jul 11;4(7):e1000120. doi: 10.1371/journal.pcbi.1000120 (PMC2517614; doi:10.1371/journal.pcbi.1000120)
Supplement: Table S1 — Assignment of Genes to Expression Classes. (0.03 MB XLS) [file pcbi.1000120.s008.xls]

## Sheet: delme_expression_class
Expression class	List of genes
1	akt-1	akt-2
2	trp-1
3	tag-97
4	gar-2	syg-1
5	F08H9.4	cnd-1	daf-12	egl-19	elo-2	hsp-16.1	hsp-16.2
	hsp-16.41	hsp-16.48	lin-29	mig-13	mod-1	sel-8	sop-3
	syn-2	unc-16	unc-59	unc-61	unc-71
6	mdl-1
7	dyn-1
8	grk-2
9	tba-2
10	vab-15
11	ace-1
12	cfi-1
13	let-60
14	bbs-5	che-13	osm-5
15	F55C5.7	unc-14	unc-51
16	gpa-1	osm-10
17	gpc-1
18	egl-43	rhgf-1
19	sra-6
20	gpa-6
21	nlp-1
22	daf-1
23	unc-30
24	gpa-2
25	wrk-1
26	deg-3	egl-46	egl-5	glr-8	mab-21	mec-10	mec-18
	mec-2	mec-3	mec-4	mec-6	mec-7	mec-9	mtd-1
	nid-1	opt-3	pat-4	unc-2	unc-97
27	tol-1
28	che-1
29	flp-21
30	mec-12
31	gpa-9
32	daf-11	lst-1	odr-1	tbx-2
33	gpa-16
34	odr-3
35	nlp-10	nlp-8
36	ttx-3
37	sro-1
38	mig-1
39	egl-21
40	pag-3
41	ceh-17
42	nlp-15
43	tph-1
44	ceh-6	hlh-2	mgl-1	qui-1	rig-5
45	cdh-3
46	ggr-1
47	vab-7
48	flp-1	nmr-1	nmr-2
49	flp-18
50	mgl-2
51	tax-2	tax-4
52	ceh-24
53	csk-1	src-1
54	cog-1
55	bra-1
56	deg-1
57	daf-9
58	lys-1	nlp-11	nlp-6	tcl-2
59	jkk-1	jnk-1	pkc-1
60	gpa-3	osm-3
61	che-3
62	unc-73
63	mps-1
64	cat-1	cat-2	dat-1
65	pef-1
66	hmr-1	unc-55
67	eat-20
68	nlp-3
69	dop-2
70	pak-1	unc-129
71	gpa-10
72	avr-15
73	sgk-1
74	osm-9
75	nhr-83
76	vab-8
77	egl-36
78	unc-40
79	unc-32
80	gpa-14
81	acr-5
82	ahr-1	gcy-35
83	egl-3
84	ceh-10
85	glr-2
86	fax-1
87	kvs-1
88	dop-1
89	sax-7
90	kal-1
91	lad-2
92	oig-1
93	ceh-14
94	des-2
95	apl-1	del-1	unc-6
96	ggr-2
97	ncs-1
98	kin-29
99	unc-103
100	lim-4
101	egl-2
102	che-2
103	dbl-1	tba-1	unc-3
104	odr-2
105	ace-2	egl-4	exc-7	zag-1
106	osm-6
107	goa-1
108	glr-1
109	eat-4
110	unc-4
111	lin-11
112	unc-53
113	unc-5
114	tax-6
115	npr-1
116	unc-42
117	ser-2
118	unc-8
119	unc-86
120	glr-5
121	glr-4
122	F25B5.2	fbxb-103
123	cha-1	unc-17
124	cam-1
125	F31D4.1	cho-1	hda-4	mab-5	nhr-22	npr-3	slo-2
	twk-30	unc-58
126	F36A2.8	avr-14	dgk-1	egl-30	egl-8	gly-18	gpa-12
	rig-4	unc-18
127	flt-1	rgs-2	sem-4
128	ins-11	ins-2	ins-22	ins-23	ins-3	ins-4	ins-5
	ins-6	ins-7	ins-8
129	lim-6	unc-119	unc-25	unc-47
130	gpa-13	gpa-15	ocr-2	srb-6
131	nlp-14	nlp-7	zig-4
132	ser-4	zig-5
133	cav-1	cdc-42	ced-10	chd-3	lin-35	lin-53	set-2
